1 **Title:** Testing for evolutionary change in restoration: a genomic comparison between *ex situ*,  
2 native and commercial seed sources of *Helianthus maximiliani*

3 **Running Title:** Genomic comparison of seed for restoration  
4  
5

6 **Authors:**

7 Joseph E Braasch<sup>1</sup>

8 ORCID [0000-0001-7502-1517](https://orcid.org/0000-0001-7502-1517)  
9

10 Lionel N Di Santo<sup>1</sup>

11 ORCID [0000-0002-8288-4860](https://orcid.org/0000-0002-8288-4860)  
12

13 Zach Tarble<sup>1</sup>  
14

15 Jarrad R Prasifka<sup>2</sup>

16 ORCID [0000-0002-6165-7319](https://orcid.org/0000-0002-6165-7319)  
17

18 Jill A Hamilton<sup>1,3</sup>

19 ORCID [0000-0002-3041-0508](https://orcid.org/0000-0002-3041-0508)  
20

21 <sup>1</sup> Department of Biological Sciences, North Dakota State University, Fargo, ND 58102

22 <sup>2</sup> Edward T. Schafer Agricultural Research Center, USDA-ARS, 1616 Albrecht Boulevard North,  
23 Fargo, ND

24 PO Box 6050, Fargo, ND, 58102 / tel: 701-231-7087 / fax: 701-231-7149

25 <sup>3</sup> CORRESPONDING AUTHOR: [jill.hamilton@ndsu.edu](mailto:jill.hamilton@ndsu.edu)  
26  
27  
28

29 **Keywords:** Ecological Restoration, Seed Provenance, Selection, Genetic Bottlenecks, *Ex Situ*  
30 Conservation, Comparative Genomics, Evolutionary Potential  
31

32 **Acknowledgments:** We would like to thank the commercial seed producers who provided seed  
33 material for use in this study. In addition, we would like to thank Anna Bucharová, Malte  
34 Conrady, Jess Lindstrom, Dan Syvertson, and Kate Volk, along with X anonymous reviewers for  
35 suggestions which greatly helped improve this paper. We also would like to thank Joshua Miller,  
36 Katie Lotterhos, and Rhiannon Peery for assistance with our analyses. This work was supported  
37 by a USDA-NACA (#433203), and a new faculty award from the office of the North Dakota  
38 Experimental Program to Stimulate Competitive Research (ND-EPSCoR NSF-IIA-1355466) to  
39 JAH, funding from NSF-RESEARCH-PGR-1856450 to JEB, and funding from the NDSU  
40 Environmental and Conservation Sciences Program to LND.  
41  
42  
43  
44  
45  
46

47 **Abstract**

48

49 Globally imperiled ecosystems often depend upon collection, propagation, and storage of seed  
50 material for use in restoration. However, during the restoration process demographic changes,  
51 population bottlenecks, and selection can alter the genetic composition of seed material, with  
52 potential impacts for restoration success. The evolutionary outcomes associated with these  
53 processes have been demonstrated using theoretical and experimental frameworks, but no studies  
54 to date have examined the impact these processes have had on the seed material maintained for  
55 conservation and restoration. In this study, we compare genomic variation across seed sources  
56 used in conservation and restoration for the perennial prairie plant *Helianthus maximiliani*, a key  
57 component of restorations across North American grasslands. We compare individuals sourced  
58 from contemporary wild populations, *ex situ* conservation collections, commercially produced  
59 restoration material, and two populations selected for agronomic traits. Overall, we observed that  
60 *ex situ* and contemporary wild populations exhibited a similar genomic composition, while four  
61 of five commercial populations and selected lines were differentiated from each other and other  
62 seed source populations. Genomic differences across seed sources could not be explained solely  
63 by isolation by distance nor directional selection. We did find evidence of sampling effects for *ex*  
64 *situ* collections, which exhibited significantly increased coancestry relative to commercial  
65 populations, suggesting increased relatedness. Interestingly, commercially sourced seed appeared  
66 to maintain an increased number of rare alleles relative to *ex situ* and wild contemporary seed  
67 sources. However, while commercial seed populations were not genetically depauperate, the  
68 genomic distance between wild and commercially produced seed suggests differentiation in the  
69 genomic composition could impact restoration success. Our results point towards the importance  
70 of genetic monitoring of species used for conservation and restoration as they are expected to be  
71 influenced by the evolutionary processes that contribute to divergence during the restoration  
72 process.

73

74

75

76 **Introduction**

77

78 Restoration aims to mitigate the loss and degradation of native ecosystems by reducing the

79 abundance of non-native species, increasing biodiversity and habitat connectivity, and re-

80 establishing native plant communities resilient to change (Benayas et al. 2009, Hobbs & Norton

81 1996, Hodgson et al. 2016, Thomson et al. 2009). To achieve these goals extensive inputs of native

82 seed are required, often in quantities too large to be harvested from local, wild populations

83 (Broadhurst et al. 2008, Merritt & Dixon 2013, Pedrini et al. 2020). To compensate for these

84 deficits, seeds used in restoration are often produced commercially to meet increasing demands.

85 However, processes associated with commercial seed production can lead to the evolution of

86 differences that may impact restoration goals (Dyer et al. 2016, Espeland et al. 2017, Nagel et al.

87 2019, Roundy et al. 1997). Evolution of seed material can occur through a combination of

88 deterministic and stochastic processes, resulting from demographic variation, population

89 bottlenecks, and selection that can influence the amount and type of genetic variation present in

90 restoration material. Bottlenecks and sampling effects following collection, propagation, or

91 cultivation may lead to reductions in genetic diversity and the loss of locally adapted alleles,

92 impacting fitness and reducing the evolutionary potential of restored populations (Blanquart et al.

93 2013, Fant et al. 2008, Kawecki & Ebert 2004, Robichaux et al. 1997, Williams 2001, Wright

94 1938). Combined with the impact of selection, which may intentionally or unintentionally lead to

95 genomic and consequent phenotypic change, there is substantial opportunity for evolution of seed

96 material during restoration (Dyer et al. 2016, Espeland et al. 2017, Nagel et al. 2019). Given the

97 impact these different evolutionary processes may have, understanding how these factors interact

98 to influence seed material will have substantial economic and ecological consequences for

99 restoration success (Bischoff et al. 2010, Bucharova et al. 2017, Gerla et al. 2012, Keller et al.

100 2000, Kimball et al. 2015).

101            Selection and sampling effects imposed during collection may also pose a significant  
102 challenge to the preservation of genetic variation in *ex situ* conservation collections. *Ex situ* seed  
103 collections aim to preserve extant genetic variation that may be incorporated into restoration or  
104 breeding programs in the future (Hamilton 1994, Li & Pritchard 2009). Both commercial and *ex*  
105 *situ* seed collections aim to maximize genetic diversity while maintaining locally adaptive genetic  
106 variation across space and time (DiSanto & Hamilton 2020). Consequently, genomic comparisons  
107 between contemporary wild populations, commercially produced material, and *ex situ*  
108 conservation collections provide an ideal means to evaluate evolution of seed material maintained  
109 for conservation and restoration (Robichaux et al. 1997, Schoen & Brown 1993, Taft et al. 2020).  
110 Genomic comparisons of conservation and restoration seed sources with contemporary native  
111 populations can be used to infer whether evolutionary challenges inherent to the collection and  
112 maintenance of these resources cause them to differ from wild populations they are intended to  
113 match.

114            Sampling effects can generate substantial genomic differences across seed sources with  
115 potential lasting impacts to conservation goals and restoration outcomes (DiSanto & Hamilton  
116 2020, Diwan et al. 1995, Franco et al. 2005, Hamilton 1994). The genomic effects of sampling  
117 correspond to those found following population bottlenecks, including a reduction in effective  
118 population sizes ( $N_e$ ) (Leberg 1992, Wright 1938), making this a useful metric to compare across  
119 populations when quantifying the effects of sampling. In addition, following a bottleneck, rare  
120 alleles are more likely to be lost, influencing the distribution of allele frequencies (Excoffier et al.  
121 2009, Maruyama & Fuerst 1985, Tajima 1989). This loss of rare alleles during bottlenecks results  
122 in larger Tajima's D estimates relative to populations with stable population sizes. Stochastic  
123 changes in allele frequencies associated with sampling may also more broadly impact estimation  
124 of inbreeding coefficients ( $F_{is}$ ) linked to inbreeding depression (Cavalli-Sforza & Bodmer 1971,

125 García-Cortés et al. 2010, Husband & Schemske 1996) or estimates of coancestry ( $\theta$ ) indicative  
126 of relatedness among individuals within populations. Importantly, not only are these metrics useful  
127 for assessing the magnitude of sampling effects they are also common proxies for evaluating short  
128 and long-term fitness due to the challenges associated with inbreeding depression and increased  
129 relatedness among breeding individuals (Angeloni et al. 2011, Caballero & Toro 2000, Hughes et  
130 al. 2008, Keller & Waller 2002). Thus, these metrics provide valuable comparisons to assess the  
131 quality of restoration and conserved seed resources relative to their wild counterparts.

132 In addition to stochastic processes associated with sampling, directional selection in the  
133 agronomic environment can impact seed during cultivation. This may include selection associated  
134 with chemical inputs and fertilizers used to improve yield, or reductions in competition or abiotic  
135 stress (Dyer et al. 2016, Espeland et al. 2017). Moreover, individuals with traits promoted by  
136 mechanized agricultural harvest, such as reduced shattering, minimum heights, or selected  
137 phenology could evolve in commercially produced material relative to wild populations (Dyer et  
138 al. 2016, Nagel et al. 2019). Previous experimental evidence indicates selection can influence the  
139 genetic and phenotypic composition of restoration seed (Dyer et al. 2016, Nagel et al. 2019), but  
140 no published studies to date have directly compared the genomic composition of commercially  
141 produced seed with native remnant populations in the region of restoration. Genomic signatures of  
142 selection can be identified through a variety of statistical analyses developed from the site  
143 frequency spectrum (SFS), the distribution of allele frequencies sampled across the genome  
144 (Hohenlohe et al. 2010, Nielsen 2001). Of these metrics, Tajima's D is notable for possessing  
145 relatively high statistical power compared to other methods for estimating the strength of selection  
146 (Simonsen et al. 1995, Tajima 1983). If selection occurs during commercial seed production, then  
147 we would expect commercial populations to have more negative values of Tajima's D relative to  
148 wild populations. Selection and sampling effects in response to the agricultural production are not

149 the only mechanisms that could cause genomic differences between commercial and wild  
150 populations. While genetic change may be attributable to anthropogenic selection, natural variation  
151 in gene flow may also contribute to genetic differentiation among populations. Isolation by  
152 distance (IBD) can create genetic differences among populations and is expected to increase with  
153 increasing spatial distance (Slatkin 1993, Wright 1943). Consequently, the relationship between  
154 geographic and genetic distance can provide a valuable null hypothesis against which alternative  
155 evolutionary scenarios may be tested (Bradburd et al. 2016). If genomic differentiation among  
156 seed source populations can be solely explained by the geographic distances between populations,  
157 we can conclude that there has not been additional evolution associated with seed source type.  
158 However, if IBD is absent or insufficient to explain population differences, other evolutionary  
159 factors likely contribute to differentiation across seed source types.

160 North American grasslands remain one of the most threatened ecosystems globally, with  
161 over 98% of remaining habitat converted due to anthropogenic development (Comer et al. 2018,  
162 Hoekstra et al. 2004, Samson et al. 2004). However, substantial efforts are ongoing to mitigate the  
163 loss of our native grasslands by applying commercially produced restoration seed mixes to reduce  
164 non-native species, enhance biodiversity, and increase connectivity across fragmented landscapes  
165 (Benayas et al. 2009, Hobbs & Norton 1996, Thomson et al. 2009). The perennial forb *Helianthus*  
166 *maximiliani* Schrad. (or Maximilian sunflower) is a common constituent of grassland  
167 communities. *H. maximiliani* encompasses an extensive range of climatic variation, with a natural  
168 distribution spanning a broad latitudinal range from northern Mexico to southern Canada  
169 (Kawakami et al. 2011, USDA 2004). Previous genetic studies using microsatellites revealed  
170 substantial heterozygosity and low inbreeding rates within populations, consistent with an obligate  
171 outcrossing mating system (Kawakami et al. 2011). Quantitative genetic experiments have also  
172 found differentiation in traits important to adaptation associated with climatic variation, including

173 freezing tolerance and flowering time (Kawakami et al. 2011, Tetreault et al. 2016). There have  
174 also been efforts to breed *H. maximiliani* (hereafter selected lines) as a source of seed oil by  
175 selecting for increased height, reduced shattering, and increased seed yield (Asselin et al. 2020).  
176 *H. maximiliani* functions as a common and effective component of grassland restoration seed  
177 mixes due to its ability to readily establish from seed, rapid spread through rhizomatous growth,  
178 and ability to reinforce soil structure in degraded habitats (McKenna et al. 2019, USDA 2004).  
179 Here, we take a genomics approach to evaluate the factors contributing to evolutionary change  
180 among *H. maximiliani* seed sources to inform both conservation and restoration efforts into the  
181 future.

182 Specifically, we compare the genomic composition of wild contemporary, *ex situ*,  
183 commercially produced, and agronomically selected seed source populations to (1) test for  
184 differences in the genomic composition of different seed source populations using ordination and  
185 metrics of genetic differentiation, (2) test whether isolation by distance or alternative evolutionary  
186 hypotheses are required to explain genomic differences among seed source populations, and (3)  
187 compare population genetic summary statistics across seed sources to indicate potential impacts  
188 of sampling and selection. With this third objective, we compare statistics that indicate how much  
189 genetic variation is maintained across seed sources as a metric of evolutionary potential, including  
190 expected heterozygosity ( $H_e$ ), inbreeding coefficients ( $F_{is}$ ), and linkage disequilibrium effective  
191 population size ( $LD-N_e$ ). We also estimate and compare parameters that can be used to evaluate  
192 whether sampling effects or the impact of selection contribute to genomic differences across seed  
193 sources. This includes  $F_{is}$  and  $LD-N_e$ , in addition to coancestry ( $\theta$ ), and Tajima's D. Overall, this  
194 study serves as an important test of recent hypotheses that identify the important role evolutionary  
195 processes can play throughout the collection, propagation, and implementation stages of  
196 conservation and restoration. Our results provide valuable guidance to both future collection and

197 deployment of seed for restoration and identify new avenues of research that can address the  
198 evolutionary consequences seed collection and cultivation have to conservation and restoration.

199

## 200 **Methods**

### 201 *Population Sampling*

202 We compared the genomic architecture of four distinct seed source types; contemporary  
203 collections from wild populations, seed collected and/or cultivated by commercial suppliers for  
204 restoration, seed preserved in *ex situ* collections, and lines selected for agronomic traits (hereafter  
205 selected lines) to assess the impact demographic variation and unintentional selection may have  
206 had on the evolution of seed material used in restoration.

207 During the summer of 2016, tissue was sampled across six naturally formed wild  
208 contemporary populations of *H. maximiliani*, separated by at least 15km, across North Dakota and  
209 Minnesota (Figure 1). Leaf tissue was sampled by randomly collecting leaves from 20 individuals  
210 per population along a 100m transect (Table 1). Following collection, leaves were preserved in  
211 silica gel prior to DNA extraction. Four commercial restoration seed suppliers within North and  
212 South Dakota provided five seed populations of *H. maximiliani* for use in this study. Commercial  
213 seed was produced either through direct harvest from the wild or by cultivating local genotypes  
214 (Table 1). All commercial seeds were harvested between 2016 and 2019.

215 *Ex situ* seed populations included in this study were sourced from the USDA National  
216 Genetic Resources Program (<https://www.ars-grin.gov/>). These bulk seed collections, designated  
217 by local provenance, were collected in North Dakota in September of 1991 (4 collections) and  
218 1995 (2 collections). *Ex situ* seeds were bulk harvested by clipping mature seed heads, following  
219 which seed heads were dried and cleaned prior to storage in a cold room at 4 °C with 25% humidity.



220 Selected lines represent germplasm developed as part of a domestication program to  
221 improve the agronomic value of perennial grassland species. Breeding populations of *H.*  
222 *maximiliani* were originally founded with 10 plants from each of 96 wild populations (960 plants  
223 total) harvested in Kansas, US. Each line was bred for five generations selecting for increased  
224 yield per stem, yield per seed head, and seed size by pooling pollen from the twenty best  
225 performing families in each generation and using pooled pollen to fertilize plants from the same  
226 twenty families. Seeds were harvested in 2014 and stored at 4 °C.

227 To obtain leaf tissue for genomic analysis, in 2018 we grew seeds sourced from  
228 commercial, *ex situ*, and selected lines indoors and under growth chamber conditions in Fargo,  
229 ND. Seeds were germinated in bulk following the protocol by Seiler (2010). Achenes were surface-  
230 sterilized, soaked for 15 minutes in a 2% solution of 5.25% sodium hypochlorite in distilled water  
231 with a single drop of wetting agent (Tween 20, Sigma-Aldrich, Inc. St. Louis, MO, USA). Achenes  
232 were then rinsed and scarified with a razor blade, cutting through the hull and tip of cotyledons  
233 before soaking in a 100 PPM solution of gibberellic acid (Sigma-Aldrich, Inc.) for 60 minutes.  
234 Following this, achenes were placed onto filter paper in Petri plates, sealed with parafilm, and  
235 stored overnight in the dark at 21°C. Seeds (embryos) were gently removed from hulls, returned  
236 to Petri plates, and examined daily for germination. Seeds with a visible radicle were planted into  
237 a moistened peat pellet (Jiffy Peat Pellet, Plantation Products, Norton, MA, USA) and grown at  
238 21°C under artificial lights (fluorescent T12 bulbs) until they produced between 4-8 true leaves.  
239 Leaf tissue samples were collected from 20 randomly selected individuals from each population  
240 or seed collection (20 individuals x 13 sources = 260 total individuals) and stored in silica gel prior  
241 to DNA extraction.

242

243 *DNA sequencing and genotyping*

244 We extracted DNA from ~10mg of dried leaf tissue using a modified Macherey-Nagel  
245 NucleoSpin Plant 2 extraction kit that included additional ethanol washes to ensure removal of  
246 secondary plant compounds. DNA concentration was verified using the Quant-iT™ PicoGreen®  
247 dsDNA kit (Life Technologies, Grand Island, NY) after submission to the University of  
248 Wisconsin-Madison Biotechnology Center for sequencing. Genomic libraries were prepared as in  
249 Elshire et al (2011) with minimal modification. In short, 50 ng of DNA was digested using the 5-  
250 bp cutter ApeKI (New England Biolabs, Ipswich, MA) after which barcoded adapters were added  
251 by ligation with T4 ligase (New England Biolabs, Ipswich, MA) for Illumina sequencing. The 96  
252 adapter-ligated samples were pooled and amplified to provide library quantities appropriate for  
253 sequencing, and adapter dimers were removed by SPRI bead purification. Fragment length and  
254 quantity of DNA was measured using the Agilent Bioanalyzer High Sensitivity Chip (Agilent  
255 Technologies, Inc., Santa Clara, CA) and Qubit® dsDNA HS Assay Kit (Life Technologies, Grand  
256 Island, NY), respectively. Libraries were standardized to 2nM and were sequenced using single  
257 read, 100bp sequencing and HiSeq SBS Kit v4 (50 Cycle) (Illumina Inc.) on an Illumina  
258 HiSeq2500. Cluster generation was performed using HiSeq SR Cluster Kit v3 cBot kits (Illumina  
259 Inc, San Diego, CA, USA).

260 Sequence files were demultiplexed using *ipyrad* version 0.9.12 (Eaton 2014) allowing for  
261 zero mismatches in the barcode region. Following demultiplexing, single nucleotide  
262 polymorphisms (SNPs) were called across populations and seed sources using the dDocent v2.7.8  
263 pipeline (Puritz et al 2014a, b). In the first step of the pipeline, reads were trimmed using the  
264 program TRIMMOMATIC (Bolger et al. 2014), including the removal of low-quality bases and  
265 Illumina adapters. Following read trimming, the pipeline aligned reads to the *Helianthus annuus*  
266 v1.0 genome using BWA (Li & Durbin 2009). Sequence alignment was performed using the  
267 software's default parameters (a match score of 1, mismatch score of 4, and gap score of 6).

268 Finally, as a last step, dDocent called SNPs using the software FREEBAYES (Garrison & Marth  
269 2012) that produced a VCF file with 4,735,557 total SNPs. Downstream SNP filtering of the VCF  
270 file first removed missing loci variants with conditional genotype quality (GQ) < 20 and genotype  
271 depth < 3. Then, loci with Phred-scores (QUAL)  $\leq 30$ , allele counts < 3, minor allele frequencies  
272 < 0.05, call rates across all individuals < 0.9, mean depth across samples > 154 (based on the  
273 equation from Li et al. 2014), and with linkage scores > 0.5 within a 10kb window were removed.  
274 Following downstream filtering, 12,943 polymorphic loci were kept and used for subsequent  
275 analyses. Individuals with more than 30% missing genotypes were removed from the analysis. In  
276 total, 14 individuals from wild contemporary populations, two individuals from *ex situ* collections,  
277 and one individual from a commercial supplier were discarded, leaving a total of 363 genotyped  
278 individuals for inclusion in subsequent analysis (Table 1).

279

### 280 *Population structure and genetic differences between seed sources*

281 To test for the effects of seed source on the genetic structure among *H. maximilani*  
282 populations, we used principal components analysis (PCA) and discriminant analysis of principal  
283 components (DAPC) to partition the genetic variation observed in our sampling. Pairing these  
284 methods provides valuable insight as it allows comparison of a method agnostic to *a priori*  
285 expectations for population structure (PCA) to one which attempts to best depict differences  
286 between populations (DAPC). Additionally, while PCA allows for the visualization of individual  
287 axes which explain decreasing amounts of the total genomic variation, DAPC can combine and  
288 display variation across multiple axes of variation simultaneously. Thus, DAPC will isolate and  
289 incorporate only those axes that contribute to differences between our populations, while PCA  
290 depicts population groupings onto major axes of variation.

291 We performed principal components analysis (PCA) on the matrix of SNPs used for all  
292 individuals in the study. Missing data (2.5% of all loci) were substituted with the mean allele  
293 frequencies at each locus. We calculated the total variation explained by each axis by dividing the  
294 eigenvalue of each PCA and the total sum of all eigenvalues. PCA was performed with the *dudi.pca*  
295 function within the ADEGENET package (Jombart 2008, Jombart & Ahmed 2011). We then  
296 plotted individuals along the first two PCA axes using *s.class* function in the package  
297 ADEGRAPHICS (Siberchicot et al. 2017).

298 We first applied DAPC to the entire SNP dataset and then to a subset of the data including  
299 only individuals from wild contemporary and *ex situ* populations. DAPC partitions genetic  
300 variance using principal components analysis before using discriminant analysis to maximize  
301 interpopulation variation and minimize intrapopulation variation. This allows DAPC to identify  
302 the axes of variation that simultaneously maximize between group differences and minimize  
303 within group differences (Jombart et al. 2010). For both analyses, we retained principal component  
304 axes sufficient to explain 90% of the total variation and retained 18 and 11 discriminant functions  
305 for depicting between group differences for all seed sources and *ex situ* – wild contemporary  
306 analysis, respectively. All DAPC analyses were performed using the R package ADEGENET  
307 (Jombart 2008).

308

### 309 *Isolation by distance in seed collections*

310 Genomic differences across populations can arise from the independent evolution of  
311 populations connected by limited gene flow giving rise to isolation by distance (IBD). Patterns of  
312 neutral evolution produced by IBD could confound our ability to infer evolutionary changes caused  
313 by selection associated with seed source type. For this reason, we tested for any correlation  
314 between  $F_{st}$  calculated between two populations and the spatial distance between them. Testing for

315 IBD was also necessary due to the uneven spatial distribution of populations from different seed  
316 sources to confidently attribute genomic differences to environmental or sampling effects  
317 associated with different seed source types.

318         Pairwise genetic differences between populations were calculated as  $F_{st}$  using the Weir and  
319 Cockerham's method which is unbiased with regard to differences in sample sizes (Weir &  
320 Cockerham 1984; Willing et al. 2012). Unlike DAPC, pairwise  $F_{st}$  allows us to quantify the total  
321 genetic differences between population pairs. Importantly, we can compare the magnitude of  
322 genetic differences for populations of the same seed source type (e.g. two wild contemporary  
323 populations) to differences calculated between populations of different seed source types (e.g. wild  
324 contemporary population versus commercial population). If evolved differences between  
325 populations have developed due to conditions associated with seed source type, we expect inter-  
326 source  $F_{st}$  to be larger than intra-source  $F_{st}$ . To test for differences in inter- and intra-source  $F_{st}$ ,  
327 we used a Wilcoxon rank sum test implemented with the function 'wilcox.test' in R.

328         To test for effects of IBD and seed source types on pairwise  $F_{st}$ , we first calculated the  
329 geographic distance between seed collections. Exact geographic location data was available for all  
330 wild contemporary and *ex situ* populations. Locations for commercial populations C-1, C-2, and  
331 C-3 were estimated as approximate locations based on descriptions of the counties, cities, reserves,  
332 and geographic features associated with the provenance for each collection. Provenance data was  
333 not available for the remaining two commercial populations (C-4, C-5) and selected lines (S-1, S-  
334 2), and therefore these populations were not included in the analysis. Geographic distances were  
335 calculated using the haversine formula, which accounts for the curvature of the earth (Robusto  
336 1957), and then square root transformed to improve model fits. Distance measurements were made  
337 using with the R package GEODIST.

338           The relationship between  $F_{st}$ , distance, and seed source types used to calculate  $F_{st}$  was  
339 evaluated using model selection with a series of linear mixed models. In these models  $F_{st}$  was  
340 expressed as function of spatial distance (fixed effect) and a factorial variable coded for the  
341 different pairwise seed source comparisons with random slopes and intercepts. The variable for  
342 seed source comparisons required six levels in total, three for each of the intra-source comparisons  
343 (wild to wild, *ex situ* to *ex situ*, and commercial to commercial) and three for each of the inter-  
344 source comparisons (wild to *ex situ*, wild to commercial, and *ex situ* to commercial). We compared  
345 the full model which included both spatial distance and seed sources to two reduced models each  
346 of which included only one of the terms. A likelihood ratio test, implemented with *lrtest* function  
347 in the package LMTEST (Zeileis & Hothorn 2002), was used to identify significant differences  
348 between the full and reduced models. When the full and reduced models were significantly  
349 different, we chose the model with the greatest loglikelihood value as the model with the best fit.

350           Additional calculations of per-locus  $F_{st}$  supported earlier analyses of population structure  
351 between seed sources, particularly for comparisons including selected lines.

352

### 353 *Signatures of Sampling and Selection*

354           To ascertain the importance of sampling effect and selection in contributing to differences  
355 among seed sources, we calculated expected heterozygosity ( $H_e$ ), inbreeding coefficients ( $F_{is}$ ),  
356 linkage disequilibrium effective population size (LD- $N_e$ ), and coancestry coefficients ( $\theta$ ).  
357 Expected heterozygosity ( $H_e$ ) and inbreeding coefficients ( $F_{is}$ ) were calculated individually for  
358 each SNP using the R package ADEGENET v2.1.0 (Jombart 2008, Jombart & Ahmed 2011). To  
359 estimate LD- $N_e$ , we followed the method of Braasch et al. (2019) which, rather than producing a  
360 single, genome wide value, uses the mean from a distribution of LD- $N_e$  estimated using multiple  
361 subsets of the data. This method reduces the likelihood of violating the assumption of no physical

362 linkage among loci in organisms without assembled genomes by repeatedly sampling a smaller  
363 subset of loci. To produce a distribution of LD- $N_e$  estimates, we created 5,000 sets of 500 loci and  
364 estimated LD- $N_e$  for each using the function `ldNe` in the package `StrataG` (Archer et al. 2017)  
365 following methods from Waples et al. (2016). Estimates of relatedness ( $\theta$ ) were made using the R  
366 package `COANCESTRY` (Wang 2011) with 2,000 bootstrap iterations to calculate 95%  
367 confidence intervals for each population.

368 We compared  $H_e$  and  $F_{is}$  across seed source types using linear mixed models with seed  
369 source type as a fixed effect and population as a random effect. The significance of individual  
370 terms and post hoc tests were performed with the R package `LMERTTEST` (Kuznetsova et al. 2017).  
371 Differences between LD- $N_e$  and  $\theta$  among wild contemporary, *ex situ*, and commercial seed  
372 sources were compared using linear models implemented with the `lm` function. Selected  
373 populations were not included in linear models due to lack of replication ( $n=2$ ).

374 To test for signatures of selection or bottlenecks across seed source types, we calculated  
375 Tajima's D for each population (Tajima 1989). Positive estimates of Tajima's D are indicative of  
376 high heterozygosity or a scarcity of rare alleles, which could be caused by balancing selection or  
377 demographic bottlenecks, as well as sampling effects. Conversely, recent population expansion or  
378 directional selection should result in negative values of D arising from an excess of rare alleles.  
379 Whole genome estimates of Tajima's D with accompanying p-values were produced with the  
380 'tajima.test' function in the R package `PEGAS` and compared across seed source types with an  
381 analysis of variance (ANOVA) and Tukey post hoc test (Paradis 2010).

382 We also note here that plotting per-locus  $F_{st}$  as a function of  $H_e$  revealed that the data were  
383 depauperate in low  $H_e$ , high  $F_{st}$  loci. This pattern has been found in other work and matches the  
384 expected relationship for these variables when drift and selection contribute similarly to  
385 evolutionary differentiation (Narum & Hess 2011). When drift and selection similarly impact the

386 genome, accounting for neutral differentiation in outlier analysis could increase type II error while  
387 failing to account for it would increase type I error. As a result, outlier analyses are not expected  
388 to yield reliable results and were therefore not considered in this manuscript.

389 We found commercial populations had greater values of Tajima's D than wild  
390 contemporary populations (see results). This difference could be caused by either the loss of rare  
391 alleles or greater genetic diversity in commercial populations. To visualize the frequency of rare  
392 alleles and overall genetic diversity across seed source types, we constructed a folded site  
393 frequency spectrum (SFS) for each seed source, with the exception of the selected lines. SFSs were  
394 estimated from the filtered SNPs dataset (12,943 variants, 363 individuals) using the set of R  
395 functions available at <https://github.com/shenglin-liu/vcf2sfs>. Individuals from populations  
396 classified as the same seed source type (Table 1) were pooled together to generate seed source-  
397 specific allele frequency profiles (Figure. 3).

398

## 399 **Results**

### 400 *Population structure and genetic differences between seed sources*

401 In total, 363 individuals and 12,943 SNP loci passed our filtering requirements. PCA of  
402 the entire dataset required 110 axes to explain over 50% of the total genetic variation across all  
403 seed source types. A total of 4.0% of the total genetic variation was explained by the first principal  
404 component axis, which differentiated the two selected populations from all other seed sources  
405 (Figure 2A). The second axis explained 2.2% of the total genetic variation and separated *ex situ*  
406 population ES- E and commercial populations C-2 and C-5 on either end of the axis and from all  
407 remaining populations at the center.

408 When genetic variation was partitioned using DAPC the first two axes explained 27.3%  
409 and 21.7% of genetic variation, respectively (Figure 2B). These values are considerably greater



410 than PCA-axes because DAPC incorporates and depicts the relationships across multiple axes of  
411 variation simultaneously. DAPC, which also attempts to maximize differences between pre-  
412 defined groups, split populations of *H. maximiliani* into four distinct groups. All wild  
413 contemporary, all *ex situ*, and commercial population C-1 from Minnesota formed one group  
414 together. The remaining four commercial populations were split into two clusters according to the  
415 state they were sourced from. Commercial populations from North Dakota, C-2 and C-5, grouped  
416 together, as did the commercial populations from South Dakota, populations C-3 and C-4. Selected  
417 populations formed their own unique cluster. The first DAPC axis split commercial populations,  
418 except for commercial population C-1, from wild, *ex situ*, and selected populations. The second  
419 DAPC axis split wild and *ex situ* genotypes from selected genotypes and split the North Dakota  
420 and South Dakota commercial populations.

421 A DAPC including only *ex situ* and wild contemporary seed explained 47.6% of the total  
422 variation in this subset of the data (Figure S1). The first and second ordination axes explained  
423 32.3% and 15.3% of genomic differences, respectively. Populations did not split according to seed  
424 source type, although most *ex situ* populations were on the left side of axis 1 and the bottom of  
425 axis 2. Each population formed a distinct cluster, except for two *ex situ* populations (ES-B and ES-  
426 E) which grouped together.

427

#### 428 *Isolation by distance in seed collections*

429 Pairwise  $F_{st}$  ranged from -0.001, between commercial populations C-2 and C-5, to 0.238  
430 between *ex situ* populations ES-E and selected population S-1 (Figure S2). Pairwise  $F_{st}$  mirrored  
431 patterns observed in PCA. The largest values of  $F_{st}$  observed were between selected and non-  
432 selected populations. Additionally,  $F_{st}$  values calculated with population ES-E were larger than  $F_{st}$   
433 calculated using any other *ex situ* collections. Across all pairwise  $F_{st}$ , inter-seed source

434 comparisons were significantly greater than intra-seed source comparisons (Wilcoxon signed rank  
435 test:  $W = 3845$ ,  $p < 0.001$ ) (Figure S3). The linear mixed model using pairwise  $F_{st}$  as the dependent  
436 variable and seed source comparison as the only independent variable was significantly better than  
437 the full model which included seed source comparison and geographic distance (Table 2). The  
438 model using only distance as an independent variable was not significantly different from the full  
439 model.

440

#### 441 *Patterns of genetic diversity and relatedness*

442 Average  $H_e$  for all *H. maximiliani* populations ranged between  $0.211 \pm 0.002$  SE and  $0.275$   
443  $\pm 0.001$  SE, while  $F_{is}$  estimates ranged from  $-0.019 \pm 0.001$  SE to  $0.018 \pm 0.002$  SE (Figure 4A, C).  
444  $H_e$  was similar across wild contemporary, *ex situ*, and commercial populations, all of which were  
445 significantly greater than  $H_e$  in selected lines (Full model:  $F_{3,15} = 6.9$ ,  $P = 0.004$ ) (Posthoc tests:  
446 wild contemporary-selected:  $P < 0.001$ , *ex situ*-selected:  $P = 0.001$ , commercial-selected:  $P = 0.002$ )  
447 (Figure 4A). There were no significant differences in  $F_{is}$  across seed source types ( $F_{3,15} = 1.1$ ,  $P =$   
448  $0.363$ ).

449 Wild contemporary and commercial seed populations spanned a wide range of  $LD-N_e$   
450 estimates in comparison to *ex situ* and selected populations (Figure 4B). Despite these trends we  
451 did not observe significant differences in  $LD-N_e$  between seed source types ( $F_{2,14} = 3.3$ ,  $P = 0.069$ ).  
452 Patterns of coancestry across seed source types mirrored those for  $LD-N_e$ . The linear model  
453 comparing the effect of seed source was significant ( $F_{2,14} = 3.6$ ,  $P = 0.037$ ). Although wild  
454 contemporary and commercial populations had lower  $\theta$  (range 0.001 to 0.022) than *ex situ* and  
455 selected populations (0.011 to 0.042), post hoc comparison revealed only *ex situ* and commercial  
456 populations were significantly different.

457           Genomewide estimates of Tajima’s D were not significantly different from neutral  
458 expectations for any population, including selected lines (Table S1). Nonetheless, Tajima’s D  
459 estimated for commercial populations was significantly greater than those for wild contemporary  
460 populations (analysis of variance:  $F_{2,14} = 3.82$ ,  $P = 0.048$ ; Tukey post hoc test wild – commercial:  
461  $P = 0.047$ ) suggesting differences in the site frequency spectrum among populations for these two  
462 seed sources. The shape of the folded SFS for wild, *ex situ*, and commercial seed sources was  
463 similar, with few rare alleles, a peak at a frequency around 0.09, and a gradual decline at higher  
464 frequencies. The SFS for commercial genotypes could be distinguished from *ex situ* and wild  
465 genotypes by a higher abundance of the rarest alleles.

466

## 467 **Discussion**

468           An overarching goal of both restoration and conservation is to maintain evolutionary  
469 potential to ensure populations sustain the ability to adapt to change (Hamilton et al. 2020,  
470 Hoffmann & Sgro 2011). However, for both *ex situ* conservation collections or seed propagated  
471 for restoration, the efficacy of these goals may be dependent upon the amount and type of genetic  
472 variation maintained in populations. Sampling effects and genetic bottlenecks associated seed  
473 collection and selection during propagation can create genotypic differences between seed source  
474 types. Using a genomic dataset assembled from wild contemporary, commercial, *ex situ*, and  
475 selected populations of *H. maximiliani*, we tested for the presence of genomic differences that  
476 could be attributed to seed source type. We found evidence that commercial seed and selected lines  
477 were genetically differentiated from wild and *ex situ* collections. These differences could not be  
478 explained by neutral processes, such as isolation by distance, implicating other evolutionary  
479 explanations for genomic differences among seed sources. While we did not find direct evidence  
480 that selection caused genomic differentiation between seed sources, increased coancestry and low

481 LD- $N_e$  in *ex situ* collections were consistent with an impact of sampling. Varying genomic  
482 composition of commercial seed sources relative to wild, contemporary populations suggest  
483 further study is required to evaluate whether genomic differences correspond to functional  
484 differences that impact restoration success. Common garden studies have shown that seed transfer  
485 across environments can impact plant traits and performance (Bucharova et al. 2017, Giencke et  
486 al. 2018, Johnson et al. 2004, Lesica & Allendorf 1999, Yoko et al. 2020). Consequently, the  
487 genomic differences we observe here warrant additional study of *H. maximiliani* seed sources  
488 linking genomic differences to traits important to adaptation and persistence in restored  
489 environments.

490 Consistent with the expectation that genotypic differences exist between seed source types,  
491 we observed genetic differences between *H. maximiliani* populations according to seed source type  
492 and region of origin. While *ex situ* and wild populations appear to have similar genomic  
493 composition, with the exception of one *ex situ* population, commercial and selected populations  
494 tended to exhibit differences across our analyses. Differences between seed source types were most  
495 apparent in the DAPC analysis. Although this method maximizes between group differences and  
496 minimizes within group differences, our analysis grouped individuals according to population,  
497 rather than seed source type. Seed source differences were also apparent with PCA, which split  
498 selected lines from all others along the first axis of variation. PCA also grouped all remaining  
499 populations, except for commercial populations C-2 and C-5, which had mostly negative values  
500 along the second PCA axis, and *ex situ* collection ES-E, which had more positive values along the  
501 second axis. Pairwise comparisons of  $F_{st}$  matched ordination analyses, and in general  $F_{st}$  calculated  
502 between collections of the same seed source type were lower than those calculated across seed  
503 source types. Overall, the differences we observed between wild and commercial seed match the  
504 expectations established by theoretical and experimental studies for how evolution via selection

505 and sampling effects could lead to differentiation between commercial and wild populations (Dyer  
506 et al. 2016, Espeland et al. 2017, Nagel et al. 2019).

507         Unexpectedly, DAPC also split the four divergent commercial populations according to  
508 the state of their collection, either North or South Dakota. The split among commercial populations  
509 was also apparent with PCA, which separated the two commercial populations from North Dakota  
510 from all other non-selected populations. Notably, within an individual region, commercial  
511 populations were grown by different suppliers despite their genomic similarity. Genetic similarity  
512 among different sources of commercial seed could indicate consistent local practices in  
513 commercial production or that suppliers are pulling from similar genetic resources. We did not  
514 find robust evidence for selection as a cause for the differences between wild and commercial seed,  
515 which suggests it is more likely that seed suppliers are using similar genetic stock. Regardless of  
516 the reason for this effect, similarity in commercial seed does not match most conservation goals  
517 which attempt to balance high genetic diversity with the need for locally adapted seed inputs  
518 (Hamilton et al. 2020, Hufford & Mazer 2003, McKay et al. 2005), a problem compounded when  
519 commercial seed is not a close analogue to wild populations. Commercial seed is used for  
520 restoration because the necessary volume of seed cannot be sustainably harvested from wild  
521 populations (Broadhurst et al. 2008). If there are few *H. maximiliani* populations of appropriate  
522 size for harvesting seed within different regions, it would then be unsurprising if different  
523 commercial suppliers obtained and mixed germplasm from the same wild sources. While we don't  
524 have information on how well the seed used in this study compares to wild genotypes as a  
525 restoration resource, the dissimilarity between commercial and wild seed warrants greater  
526 communication between seed suppliers and restoration practitioners to understand the potential  
527 causes of genomic differences.

528 Genomic differences between *H. maximiliani* populations were not correlated with  
529 geographic distances and do not appear to demonstrate patterns of IBD. In natural populations,  
530 genomic differences are expected to increase in response to increasing spatial distance and a  
531 corresponding reduction in gene flow among populations (Slatkin 1993, Wright 1943). The  
532 absence of IBD in our data could have multiple explanations. First, there could be sufficient gene  
533 flow to connect *H. maximiliani* populations across the largest spatial scales included in our  
534 analysis, but substantial gene flow should also homogenize the genomic variation between  
535 populations. This does not correspond to the results of our DAPC analysis, which was able to  
536 partition genomic variation, not just at the scale of seed source types, but at the level of individual  
537 populations. An alternative cause for the lack of IBD could be rates of gene flow near zero, such  
538 that every population is functionally isolated, negating the effect of distance. Although  
539 fragmentation of prairie habitat in North America has indeed increased the isolation among plant  
540 populations (Samson et al. 2004; Wimberly et al. 2018), the complete cessation of gene flow across  
541 populations has not been observed in other species. In the grass *Festuca hallii*, distance was still  
542 correlated with genetic variation across the same geographic region considered in our study (Qiu  
543 et al. 2009). Although grasses and sunflowers differ in their pollination ecology and methods of  
544 seed dispersal, these patterns of differentiation in *F. hallii* suggest it is unlikely that prairie plant  
545 populations are so isolated that geographic distance has no effect on population structure. Rather,  
546 given the structure of our analysis, it is more probable that seed source differences disrupted  
547 patterns of IBD and more strongly predicted differences in pairwise  $F_{st}$ . Increased sampling across  
548 commercial and wild populations would be useful to supplement our observations on the effect of  
549 seed source type and warrants additional study. Knowledge of the degree to which commercial  
550 propagation disrupts the effects of natural IBD in *H. maximiliani* populations would be valuable  
551 for restoration practitioners seeking to best match seed inputs to local environmental conditions.

552 Selection during agricultural propagation can result in the evolution of restoration seed,  
553 altering traits that contribute to growth and phenology (Dyer et al. 2016, Nagel et al. 2019).  
554 Although commercial populations were genetically distinct from wild contemporary populations,  
555 we did not find evidence that differences are due to selection. Commercial and wild populations  
556 did not differ in  $H_e$ ,  $F_{is}$ ,  $LD-N_e$ , or coancestry. Tajima's  $D$  in commercial populations was also not  
557 significantly different from zero, which suggests that selection has not been strong enough to exert  
558 genome scale effects. Interestingly, Tajima's  $D$  was significantly greater in commercial than wild  
559 populations, which is likely caused by a slight increase in the frequency of rare alleles in  
560 commercial populations. Although selection in agricultural ecosystems is common, experimental  
561 cultivation of five different plant species found that molecular evidence of evolution was not  
562 apparent in two (Nagel et al. 2019). Species that were perennial or outcrossing, such as *H.*  
563 *maximiliani*, were also less likely to exhibit evidence of selection. Thus, although we uncovered  
564 multiple ways in which commercial and wild populations differ, the life history and mating system  
565 of *H. maximiliani* may have buffered the species against evolutionary change during commercial  
566 production. Overall, the genomic differences between commercial and wild populations do not  
567 appear to be driven by selection during cultivation, a phenomenon which might be more common  
568 in plant species with shorter life histories or that exhibit greater instances of selfing.

569 We found significant differences in coancestry between *ex situ* and commercial seed  
570 sources. *Ex situ* populations also had lower  $LD-N_e$  than commercial populations, and although  
571 this comparison was not significant, a high coancestry should coincide with higher rates of linkage  
572 disequilibrium and lower  $LD-N_e$ . Low  $LD-N_e$  and higher coancestry without corresponding  
573 increases in  $F_{is}$  could reflect the sampling methods used to establish these collections. Alleles are  
574 more likely to be identical by descent in populations with greater coancestry and are less likely to  
575 represent the uniform sampling of large populations (Cavalli-Sforza & Bodmer 1971). In *ex situ*

576 collections, high coancestry and low LD- $N_e$  could result from sampling large quantities of seed  
577 from a relatively small number of maternal individuals. Sampling in this manner would also not  
578 immediately reduce  $H_e$  or increase  $F_{is}$  in a self-incompatible species prior to sexual reproduction  
579 (Allendorf 1986, Leberg 1992), but would increase coancestry and LD- $N_e$  because of the large  
580 number of half-siblings represented in the population. The difference between commercial and *ex*  
581 *situ* collections may imply that commercial seed provides a superior resource by harboring greater  
582 genotypic diversity. Whether or not this is true likely depends on the specific goal of the collection.  
583 For example, high coancestry could be mitigated if multiple *ex situ* collections are mated prior to  
584 deployment in the wild. Additionally, *ex situ* collections appear to be closer analogues to  
585 contemporary wild populations and could be superior resources for restoration if the genotypic  
586 differences depicted in our analysis correlate with functional differences. This suggests additional  
587 work to evaluate the consequences of high coancestry and genomic differences from wild  
588 populations will be essential for applying our results into practice for restoration.

589         The production of seed for restoration and conservation includes an inherent conflict  
590 between maintaining the genomic composition of wild populations and supplying large volumes  
591 of seed (Broadhurst et al. 2008, Espeland et al. 2017). In addition to these challenges, the goals of  
592 conservation are themselves sometimes in conflict, with the need to maintain populations that are  
593 locally adapted while maximizing genetic diversity to buffer against contemporary and future  
594 environmental challenges respectively (Bucharova et al. 2017, Hamilton et al. 2020). The loss of  
595 genetic diversity and evolution of functional traits during cultivation is thus a major concern for  
596 restoration efforts. In our comparison of commercial and wild *H. maximiliani* collections, we did  
597 not find evidence of selection or reduced genetic variation in commercial seed, but we did observe  
598 significant differences in their genotypic composition. Additionally, the surprising genomic  
599 similarity of commercial seed sourced from the same region is evidence for a homogenizing factor



600 either during seed collection or cultivation. High similarity across commercial seed inputs is at  
601 odds with the goal of maximizing genetic diversity while maintaining local adaptation and has the  
602 potential to reduce the efficacy of restoration in the short and long-term. Given the species-specific  
603 evolutionary consequences of cultivation (Nagel et al. 2019), it is also possible that other seed  
604 inputs which are less buffered against the genomic effects of selection, due to their life history or  
605 mating strategies, will exhibit increased differentiation from wild populations during commercial  
606 production. Additional study evaluating the trait variation and contribution of *H. maximiliani* to  
607 ecosystem services between wild and commercial seed collected across varied restored habitats is  
608 necessary. Furthermore, to fully integrate the consequences of our study for restoration similar  
609 work comparing plant species commonly used in restoration will be important for generalizing  
610 these results. Until this work can be performed, increased collaboration between producers and  
611 users of commercial seed is needed to better understand the effects of provenance, individual  
612 methods of harvest, and cultivation on seed material needed to best meet restoration goals  
613 (Hamilton et al. 2020).

614

615

616

617

618

619

620

621

622

623

624

625

626 **References**

627 Allendorf, F. W. (1986). Genetic drift and the loss of alleles versus heterozygosity. *Zoo Biology*,  
628 5(2), 181–190.

629 Angeloni, F., Ouborg, N. J., & Leimu, R. (2011). Meta-analysis on the association of population  
630 size and life history with inbreeding depression in plants. *Biological Conservation*, 144(1), 35–  
631 43.

632 Archer, F. I., Adams, P. E., & Schneiders, B. B. (2017). stratag: An r package for manipulating,  
633 summarizing and analysing population genetic data. *Molecular Ecology Resources*, 17(1), 5–11.

634 Asselin, S. R., Brûlé-Babel, A. L., Van Tassel, D. L., & Cattani, D. J. (2020). Genetic analysis of  
635 domestication parallels in annual and perennial sunflowers (*Helianthus* spp.): routes to crop  
636 development. *Frontiers in Plant Science*, 11, 834.

637 Benayas, J. M., Newton, A. C., Diaz, A., & Bullock, J. M. (2009). Enhancement of biodiversity and  
638 ecosystem services by ecological restoration: a meta-analysis. *Science*, 325(5944), 1121–1124.

639 Bischoff, A., Vonlanthen, B., Steinger, T., & Müller-Schärer, H. (2006). Seed provenance  
640 matters—effects on germination of four plant species used for ecological restoration. *Basic and*  
641 *Applied Ecology*, 7(4), 347–359.

642 Blanquart, F., Kaltz, O., Nuismer, S. L., & Gandon, S. (2013). A practical guide to measuring local  
643 adaptation. *Ecology Letters*, 16(9), 1195–1205.

644 Bolger, A. M., Lohse, M., & Usadel, B. (2014). Trimmomatic: a flexible trimmer for Illumina  
645 sequence data. *Bioinformatics*, 30(15), 2114–2120.

646 Braasch, J., Barker, B. S., & Dlugosch, K. M. (2019). Expansion history and environmental  
647 suitability shape effective population size in a plant invasion. *Molecular Ecology*, 28(10), 2546–  
648 2558.

649 Bradburd, G. S., Ralph, P. L., & Coop, G. M. (2016). A spatial framework for understanding  
650 population structure and admixture. *PLoS Genetics*, 12(1), e1005703.

651 Broadhurst, L. M., Lowe, A., Coates, D. J., Cunningham, S. A., McDonald, M., Vesk, P. A., & Yates,  
652 C. (2008). Seed supply for broadscale restoration: maximizing evolutionary potential.  
653 *Evolutionary Applications*, 1(4), 587–597.

654 Bucharova, A., Durka, W., Hölzel, N., Kollmann, J., Michalski, S., & Bossdorf, O. (2017). Are local  
655 plants the best for ecosystem restoration? It depends on how you analyze the data. *Ecology*  
656 *and Evolution*, 7(24), 10683–10689.

- 657 Caballero, A., & Toro, M. A. (2000). Interrelations between effective population size and other  
658 pedigree tools for the management of conserved populations. *Genetical Research*, 75(3), 331–  
659 343.
- 660 Cavalli-Sforza, L. L., & Bodmer, W. F. (1971). *The Genetics of Human Populations*. W. H. Freeman  
661 and Company.
- 662 Comer, P. J., Hak, J. C., Kindscher, K., Muldavin, E., & Singhurst, J. (2018). Continent-scale  
663 landscape conservation design for temperate grasslands of the Great Plains and Chihuahuan  
664 Desert. *Natural Areas Journal*, 38(2), 196–211.
- 665 DiSanto, L. N., & Hamilton, J. A. (2020). Using environmental and geographic data to optimize  
666 ex situ collections and preserve evolutionary potential. *Conservation Biology: The Journal of the*  
667 *Society for Conservation Biology*, 7, 12.
- 668 Diwan, N., McIntosh, M. S., & Bauchan, G. R. (1995). Methods of developing a core collection of  
669 annual Medicago species. *TAG. Theoretical and Applied Genetics. Theoretische Und*  
670 *Angewandte Genetik*, 90(6), 755–761.
- 671 Dyer, A. R., Knapp, E. E., & Rice, K. J. (2016). Unintentional selection and genetic changes in  
672 native perennial grass populations during commercial seed production. *Ecological Restoration*,  
673 34(1), 39–48.
- 674 Eaton, D. A. R. (2014). PyRAD: assembly of de novo RADseq loci for phylogenetic analyses.  
675 *Bioinformatics*, 30(13), 1844–1849.
- 676 Elshire, R. J., Glaubitz, J. C., Sun, Q., Poland, J. A., Kawamoto, K., Buckler, E. S., & Mitchell, S. E.  
677 (2011). A robust, simple genotyping-by-sequencing (GBS) approach for high diversity species.  
678 *PloS One*, 6(5), e19379.
- 679 Espeland, E. K., Emery, N. C., Mercer, K. L., Woolbright, S. A., Kettenring, K. M., Gepts, P., &  
680 Etterson, J. R. (2017). Evolution of plant materials for ecological restoration: insights from the  
681 applied and basic literature. *The Journal of Applied Ecology*, 54(1), 102–115.
- 682 Excoffier, L., Foll, M., & Petit, R. J. (2009). Genetic consequences of range expansions. *Annual*  
683 *Review of Ecology, Evolution, and Systematics*, 40(1), 481–501.
- 684 Fant, J. B., Holmstrom, R. M., Sirkin, E., Etterson, J. R., & Masi, S. (2008). Genetic structure of  
685 threatened native populations and propagules used for restoration in a clonal species,  
686 American beachgrass (*Ammophila breviligulata* Fern.). *Restoration Ecology*, 16(4), 594–603.
- 687 Franco, J., Crossa, J., Taba, S., & Shands, H. (2005). A sampling strategy for conserving genetic  
688 diversity when forming core subsets. *Crop Science*, 45(3), 1035–1044.
- 689 García-Cortés, L. A., Martínez-Ávila, J. C., & Toro, M. A. (2010). Fine decomposition of the  
690 inbreeding and the coancestry coefficients by using the tabular method. *Conservation Genetics*,  
691 11, 1945–1952.

- 692 Garrison, E., & Marth, G. (2012). Haplotype-based variant detection from short-read  
693 sequencing. In *arXiv [q-bio.GN]*. arXiv. <http://arxiv.org/abs/1207.3907>
- 694 Giencke, L. M., & Carol Denhof, R. (2018). Seed sourcing for longleaf pine ground cover  
695 restoration: using plant performance to assess seed transfer zones and home-site advantage.  
696 *Restoration*, 26(6), 1127–1136.
- 697 Hamilton, M. B. (1994). Ex Situ Conservation of Wild Plant Species: Time to Reassess the  
698 Genetic Assumptions and Implications of Seed Banks. *Conservation Biology*, 8(1), 39–49.
- 699 Hamilton, J., Flint, S., Lindstrom, J., Volk, K., Shaw, R., & Ahlering, M. (2020). Evolutionary  
700 approaches to seed sourcing for grassland restorations. *The New Phytologist*, 225(6), 2246–  
701 2248.
- 702 Hobbs, R. J., & Norton, D. A. (1996). Towards a conceptual framework for restoration ecology.  
703 *Restoration Ecology*, 4(2), 93–110.
- 704 Hodgson, J. A., Wallis, D. W., Krishna, R., & Cornell, S. J. (2016). How to manipulate landscapes  
705 to improve the potential for range expansion. *Methods in Ecology and Evolution / British*  
706 *Ecological Society*, 7(12), 1558–1566.
- 707 Hoekstra, J. M., Boucher, T. M., Ricketts, T. H., & Roberts, C. (2004). Confronting a biome crisis:  
708 global disparities of habitat loss and protection. *Ecology Letters*, 8(1), 23–29.
- 709 Hoffmann, A. A., & Sgrò, C. M. (2011). Climate change and evolutionary adaptation. *Nature*,  
710 470(7335), 479–485.
- 711 Hohenlohe, P. A., Phillips, P. C., & Cresko, W. A. (2010). Using population genomics to detect  
712 selection in natural populations: key concepts and methodological considerations. *International*  
713 *Journal of Plant Sciences*, 171(9), 1059–1071.
- 714 Hufford, K. M., & Mazer, S. J. (2003). Plant ecotypes: genetic differentiation in the age of  
715 ecological restoration. *Trends in Ecology & Evolution*, 18(3), 147–155.
- 716 Hughes, A. R., Inouye, B. D., Johnson, M. T. J., Underwood, N., & Vellend, M. (2008). Ecological  
717 consequences of genetic diversity. *Ecology Letters*, 11(6), 609–623.
- 718 Husband, B. C., & Schemske, D. W. (1996). Evolution of the magnitude and timing of inbreeding  
719 depression in plants. *Evolution; International Journal of Organic Evolution*, 50(1), 54–70.
- 720 Johnson, G. R., Sorensen, F. C., St Clair, J. B., & Cronn, R. C. (2004). Pacific Northwest Forest  
721 Tree Seed Zones: A template for native plants? *Native Plants Journal*, 5(2), 131–140.
- 722 Jombart, T. (2008). adegenet: A R package for the multivariate analysis of genetic markers.  
723 *Bioinformatics*, 24(11), 1403–1405.
- 724 Jombart, T., & Ahmed, I. (2011). adegenet 1.3-1: new tools for the analysis of genome-wide SNP  
725 data. *Bioinformatics*, 27(21), 3070–3071.

- 726 Jombart, T., Devillard, S., & Balloux, F. (2010). Discriminant analysis of principal components: a  
727 new method for the analysis of genetically structured populations. *BMC Genetics*, *11*, 94.
- 728 Kawakami, T., Darby, B. J., & Ungerer, M. C. (2014). Transcriptome resources for the perennial  
729 sunflower *Helianthus maximiliani* obtained from ecologically divergent populations. *Molecular*  
730 *Ecology Resources*, *14*(4), 812–819.
- 731 Kawecki, T. J., & Ebert, D. (2004). Conceptual issues in local adaptation. *Ecology Letters*, *7*(12),  
732 1225–1241.
- 733 Keller, M., Kollmann, J., & Edwards, P. J. (2000). Genetic introgression from distant provenances  
734 reduces fitness in local weed populations. *The Journal of Applied Ecology*, *37*(4), 647–659.
- 735 Keller, L. F., & Waller, D. M. (2002). Inbreeding effects in wild populations. *Trends in Ecology &*  
736 *Evolution*, *17*(5), 230–241.
- 737 Kimball, S., Lulow, M., Sorenson, Q., Balazs, K., Fang, Y.-C., Davis, S. J., O’Connell, M., & Huxman,  
738 T. E. (2015). Cost-effective ecological restoration. *Restoration Ecology*, *23*(6), 800–810.
- 739 Kuznetsova, A., Brockhoff, P. B., Christensen, R. H. B., & Others. (2017). lmerTest package: tests  
740 in linear mixed effects models. *Journal of Statistical Software*, *82*(13), 1–26.
- 741 Leberg, P. L. (1992). Effects of population bottlenecks on genetic diversity as measured by  
742 allozyme electrophoresis. *Evolution; International Journal of Organic Evolution*, *46*(2), 477–494.
- 743 Lesica, P., & Allendorf, F. W. (1999). Ecological genetics and the restoration of plant  
744 communities: Mix or match? *Restoration Ecology*, *7*(1), 42–50.
- 745 Li, H., & Durbin, R. (2009). Fast and accurate short read alignment with Burrows–Wheeler  
746 transform. *Bioinformatics*, *25*(14), 1754–1760.
- 747 Li, D.-Z., & Pritchard, H. W. (2009). The science and economics of ex situ plant conservation.  
748 *Trends in Plant Science*, *14*(11), 614–621.
- 749 Maruyama, T., & Fuerst, P. A. (1985). Population bottlenecks and nonequilibrium models in  
750 population genetics. II. Number of alleles in a small population that was formed by a recent  
751 bottleneck. *Genetics*, *111*(3), 675–689.
- 752 McKay, J. K., Christian, C. E., Harrison, S., & Rice, K. J. (2005). “How local is local?” —a review of  
753 practical and conceptual issues in the genetics of restoration. *Restoration Ecology*, *13*(3), 432–  
754 440.
- 755 McKenna, T. P., McDonnell, J., Yurkonis, K. A., & Brophy, C. (2019). *Helianthus maximiliani* and  
756 species fine-scale spatial pattern affect diversity interactions in reconstructed tallgrass prairies.  
757 *Ecology and Evolution*, *9*(21), 12171–12181.
- 758 Merritt, D. J., & Dixon, K. W. (2011). Restoration seed banks—a matter of scale. *Science*,  
759 *332*(6028), 424–425.

- 760 Nagel, R., Durka, W., Bossdorf, O., & Bucharova, A. (2019). Rapid evolution in native plants  
761 cultivated for ecological restoration: not a general pattern. *Plant Biology*, *21*(3), 551–558.
- 762 Narum, S. R., & Hess, J. E. (2011). Comparison of FST outlier tests for SNP loci under selection.  
763 *Molecular Ecology Resources*, *11*(Suppl. 1), 184–194.
- 764 Nielsen, R. (2001). Statistical tests of selective neutrality in the age of genomics. *Heredity*, *86*(Pt  
765 6), 641–647.
- 766 Paradis, E. (2010). pegas: An R package for population genetics with an integrated–modular  
767 approach. *Bioinformatics*, *26*(3), 419–420.
- 768 Pedrini, S., Gibson-Roy, P., Trivedi, C., Gálvez-Ramírez, C., Hardwick, K., Shaw, N., Frischie, S.,  
769 Laverack, G., & Dixon, K. (2020). Collection and production of native seeds for ecological  
770 restoration. *Restoration Ecology*, *28*(S3), 198.
- 771 Puritz, J. B., Hollenbeck, C. M., & Gold, J. R. (2014a). dDocent: a RADseq, variant-calling pipeline  
772 designed for population genomics of non-model organisms. *PeerJ*, *2*, e431.
- 773 Puritz, J. B., Matz, M. V., Toonen, R. J., Weber, J. N., Bolnick, D. I., & Bird, C. E. (2014b).  
774 Demystifying the RAD fad. *Molecular Ecology*, *23*(24), 5937–5942.
- 775 Qiu, J., Fu, Y.-B., Bai, Y., & Wilmschurst, J. F. (2009). Genetic variation in remnant *Festuca hallii*  
776 populations is weakly differentiated, but geographically associated across the Canadian Prairie.  
777 *Plant Species Biology*, *24*(3), 156–168.
- 778 Robichaux, R. H., Friar, E. A., & Mount, D. W. (1997). Molecular genetic consequences of a  
779 population bottleneck associated with reintroduction of the Mauna Kea Silversword  
780 (*Argyroxiphium sandwicense* ssp. *sandwicense* [Asteraceae]). *Conservation Biology: The Journal*  
781 *of the Society for Conservation Biology*, *11*(5), 1140–1146.
- 782 Robusto, C. C. (1957). The cosine-haversine formula. *The American Mathematical Monthly: The*  
783 *Official Journal of the Mathematical Association of America*, *64*(1), 38–40.
- 784 Roundy, B.A., Shaw, N.L. & Booth, D.T. (1997) Using native seeds on rangelands. pp. 1–8. In N.L.  
785 Shaw and B.A. Roundy (comps.) Proceedings: Using seeds of native species on rangelands. Gen.  
786 Tech. Rep. INT-GTR-372. U.S. Department of Agriculture, Forest Service, Intermountain  
787 Research Station. Ogden, UT, USA.
- 788 Samson, F. B., Knopf, F. L., & Ostlie, W. R. (2004). Great Plains ecosystems: past, present, and  
789 future. *Wildlife Society Bulletin*, *32*(1), 6–15.
- 790 Schoen, D. J., & Brown, A. H. (1993). Conservation of allelic richness in wild crop relatives is  
791 aided by assessment of genetic markers. *Proceedings of the National Academy of Sciences of*  
792 *the United States of America*, *90*(22), 10623–10627.
- 793 Seiler, G. J. (2010). Germination and viability of wild sunflower species achenes stored at room  
794 temperature for 20 years. *Seed Science and Technology*, *38*(3), 786–791.

- 795 Siberchicot, A., Julien-Laferrière, A., Dufour, A.-B., Thioulouse, J., & Dray, S. (2017). adegraphics:  
796 an S4 lattice-based package for the representation of multivariate data. *The R Journal*, 9(2).  
797 <https://journal.r-project.org/archive/2017/RJ-2017-042/RJ-2017-042.pdf>
- 798 Simonsen, K. L., Churchill, G. A., & Aquadro, C. F. (1995). Properties of statistical tests of  
799 neutrality for DNA polymorphism data. *Genetics*, 141(1), 413–429.
- 800 Slatkin, M. (1993). Isolation by distance in equilibrium and non-equilibrium populations.  
801 *Evolution; International Journal of Organic Evolution*, 47(1), 264–279.
- 802 Taft, H. R., McCoskey, D. N., Miller, J. M., Pearson, S. K., Coleman, M. A., Fletcher, N. K., Mittan,  
803 C. S., Meek, M. H., & Barbosa, S. (2020). Research–management partnerships: An opportunity  
804 to integrate genetics in conservation actions. *Conservation Science and Practice*, 2(9).  
805 <https://doi.org/10.1111/csp2.218>
- 806 Tajima, F. (1983). Evolutionary relationship of DNA sequences in finite populations. *Genetics*,  
807 105(2), 437–460.
- 808 Tajima, F. (1989). The effect of change in population size on DNA polymorphism. *Genetics*,  
809 123(3), 597–601.
- 810 Tetreault, H. M., Kawakami, T., & Ungerer, M. C. (2016). Low temperature tolerance in the  
811 perennial sunflower *Helianthus maximiliani*. *The American Midland Naturalist*, 175(1), 91–102.
- 812 Thomson, J. R., Moilanen, A. J., Veski, P. A., Bennett, A. F., & Nally, R. M. (2009). Where and  
813 when to revegetate: a quantitative method for scheduling landscape reconstruction. *Ecological*  
814 *Applications: A Publication of the Ecological Society of America*, 19(4), 817–828.
- 815 United States Department of Agriculture. (2004). *USDA NRCS Plant Guide; Maximilian*  
816 *Sunflower*. [https://plants.sc.egov.usda.gov/plantguide/pdf/pg\\_hema2.pdf](https://plants.sc.egov.usda.gov/plantguide/pdf/pg_hema2.pdf)
- 817 Wang, J. (2011). COANCESTRY: a program for simulating, estimating and analyzing relatedness  
818 and inbreeding coefficients. *Molecular Ecology Resources*, 11(1), 141–145.
- 819 Waples, R. K., Seeb, L. W., & Seeb, J. E. (2016). Linkage mapping with paralogs exposes regions  
820 of residual tetrasomic inheritance in chum salmon (*Oncorhynchus keta*). *Molecular Ecology*  
821 *Resources*, 16(1), 17–28.
- 822 Weir, B. S., & Cockerham, C. C. (1984). Estimating f-statistics for the analysis of population  
823 structure. *Evolution; International Journal of Organic Evolution*, 38(6), 1358–1370.
- 824 Williams, S. L. (2001). Reduced genetic diversity in eelgrass transplantations affects both  
825 population growth and individual fitness. In M D Bertness S D Gaines M E Hay (Ed.), *Marine*  
826 *Community Ecology* (pp. 317–337). Sinauer Associates.
- 827 Willing, E.-M., Dreyer, C., & van Oosterhout, C. (2012). Estimates of genetic differentiation  
828 measured by F(ST) do not necessarily require large sample sizes when using many SNP markers.  
829 *PloS One*, 7(8), e42649.

830 Wimberly, M. C., Narem, D. M., Bauman, P. J., Carlson, B. T., & Ahlering, M. A. (2018). Grassland  
831 connectivity in fragmented agricultural landscapes of the north-central United States. *Biological*  
832 *Conservation*, 217, 121–130.

833 Wright, S. (1938). Size of population and breeding structure in relation to evolution. *Science*,  
834 87(2263), 430–431.

835 Wright, S. (1943). Isolation by Distance. *Genetics*, 28(2), 114–138.

836 Yoko, Z. G., Volk, K. L., Dochtermann, N. A., & Hamilton, J. A. (2020). The importance of  
837 quantitative trait differentiation in restoration: landscape heterogeneity and functional traits  
838 inform seed transfer guidelines. *AoB Plants*, 12(2), laa009.

839 Zeileis, A., & Hothorn, T. (2002). *Diagnostic checking in regression relationships*. pkg.cs.ovgu.de.  
840 [http://pkg.cs.ovgu.de/LNF/i386/5.10/R/LNFr-lmtest/reloc/R-2.10/library/lmtest/doc/lmtest-](http://pkg.cs.ovgu.de/LNF/i386/5.10/R/LNFr-lmtest/reloc/R-2.10/library/lmtest/doc/lmtest-intro.pdf)  
841 [intro.pdf](http://pkg.cs.ovgu.de/LNF/i386/5.10/R/LNFr-lmtest/reloc/R-2.10/library/lmtest/doc/lmtest-intro.pdf)

842

843

844

845

846

847

848

849

850

851

852

853

854

855

856

857



858

859

860 Table and Figure Captions

861

862 Table 1. Geographic location, sample size, and year of harvest for *Helianthus maximiliani* seed  
863 sources.

| Seed Source              | Population ID | n  | State Collected |          | Longitude | Cultivated | Year of harvest |
|--------------------------|---------------|----|-----------------|----------|-----------|------------|-----------------|
|                          |               |    | From            | Latitude |           |            |                 |
| <i>Ex situ</i>           |               |    |                 |          |           |            |                 |
|                          | ES-A          | 20 | ND              | 47.4333  | -98.3333  | N          | 1991            |
|                          | ES-B          | 20 | ND              | 46.9167  | -97.1833  | N          | 1991            |
|                          | ES-C          | 19 | ND              | 47.4333  | -98.1167  | N          | 1991            |
|                          | ES-D          | 19 | ND              | 46.3500  | -98.3333  | N          | 1991            |
|                          | ES-E          | 20 | MN              | 46.9833  | -96.7500  | N          | 1995            |
|                          | ES-F          | 20 | ND              | 46.6500  | -97.2333  | N          | 1995            |
| <i>Wild Contemporary</i> |               |    |                 |          |           |            |                 |
|                          | W-1           | 13 | ND              | 46.8758  | -97.2321  | N          | 2016            |
|                          | W-2           | 20 | MN              | 46.8554  | -96.4814  | N          | 2016            |
|                          | W-3           | 13 | ND              | 46.7278  | -96.8339  | N          | 2016            |
|                          | W-4           | 20 | ND              | 46.2459  | -97.4060  | N          | 2016            |
|                          | W-5           | 20 | ND              | 46.0216  | -97.3462  | N          | 2016            |
|                          | W-6           | 20 | ND              | 46.0177  | -97.0537  | N          | 2016            |
| <i>Commercial</i>        |               |    |                 |          |           |            |                 |
|                          | C-1           | 20 | MN              | 45.5895  | -95.7600  | N          | 2017            |
|                          | C-2           | 20 | ND              | 46.8697  | -96.8903  | Y          | 2018            |
|                          | C-3           | 20 | SD              | 44.4031  | -99.9997  | Y          | 2016            |
|                          | C-4           | 20 | SD              | -        | -         | Y          | 2016            |
|                          | C-5           | 19 | ND              | -        | -         | N          | 2017            |
| <i>Selected Lines</i>    |               |    |                 |          |           |            |                 |
|                          | S-1           | 20 | KS              | -        | -         | Y          | 2014            |
|                          | S-2           | 20 | KS              | -        | -         | Y          | 2014            |

864

865 Note:

866 n: number of individuals in each population retained for genetic analysis.

867 State Collected From: MN, Minnesota; ND, North Dakota; SD, South Dakota.

868 Cultivated: N, seed collected from naturally growing stands; Y, grown in an agroecosystem for at

869 least one generation prior to seed harvest

870

871 Table 2. The effect of isolation by distance and seed source on pairwise  $F_{st}$ . Reduced models were  
872 compared to the full model using the likelihood ratio test. P-values in bold indicate significant  
873 differences between the reduced and full model.

| <u>Model</u>                      | <u>Log-likelihood</u> | <u>Df</u> | <u>P-value</u> |
|-----------------------------------|-----------------------|-----------|----------------|
| Distance + Seed Source Comparison | 223.75                | -         | -              |
| Distance                          | 223.49                | 1         | 0.42           |
| Seed Source Comparison            | 228.98                | 1         | <b>0.001</b>   |

874

875

876

877

878

879

880

881

882

883

884

885

886

887

888

889

890

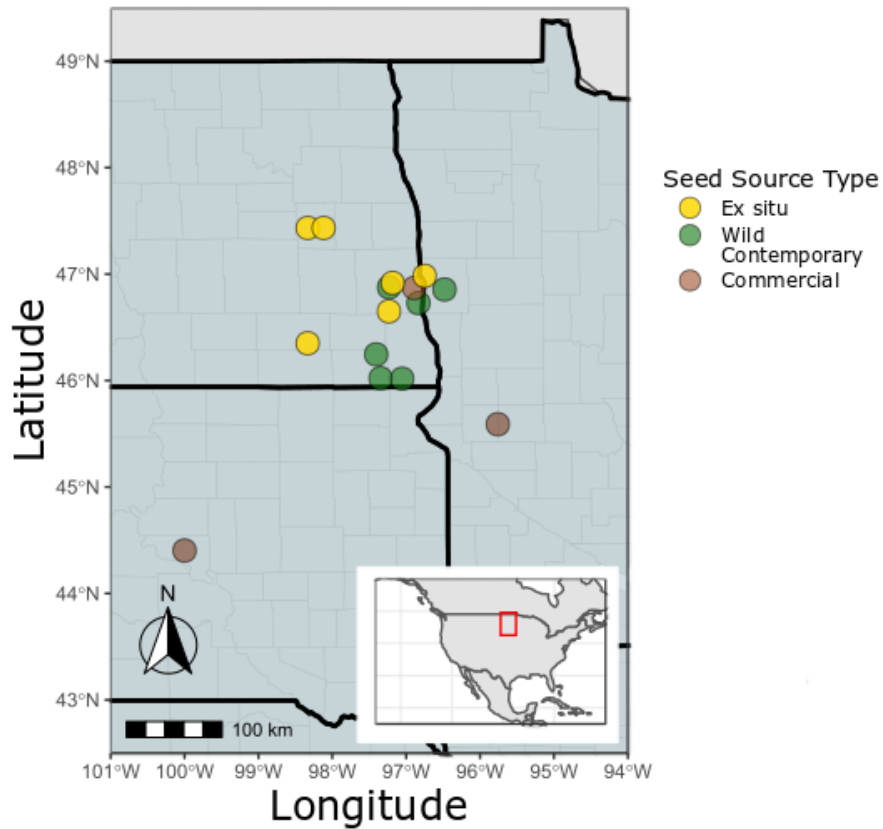

891

892 Figure 1. Sampling locations of *Helianthus maximiliani* seed across the northern United States.

893 Location data was available for all native remnant and *ex situ* seed sources and three of the five

894 commercial seed sources used in this study. Location data for the remaining commercially

895 produced seed was not available.

896

897

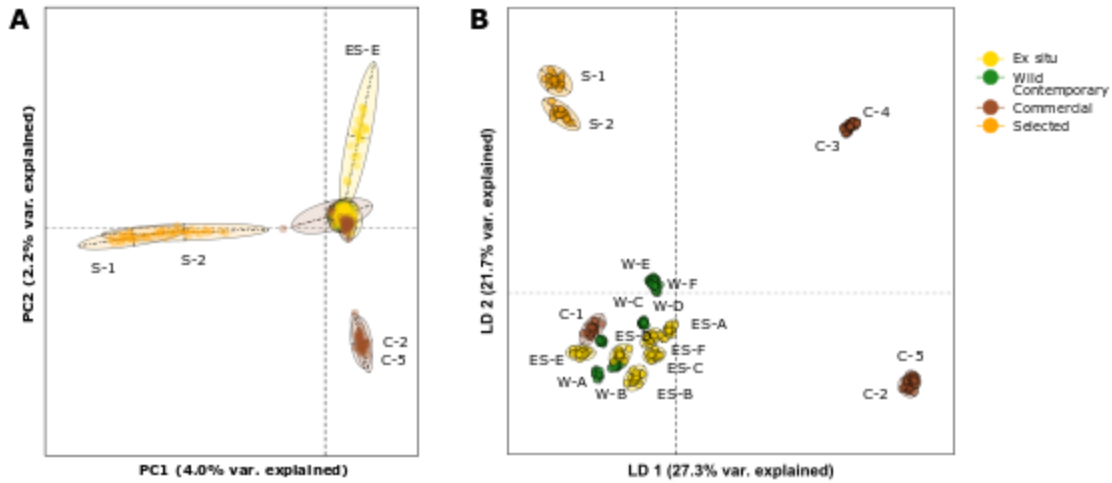

898

899 Figure 2. Genomic variation of *Helianthus maximiliani* partitioned by (A) principal components  
900 analysis (PCA) and (B) discriminant analysis of principal components. Both analyses were  
901 conducted on the full SNP dataset for all *ex situ*, wild contemporary, commercial, and selected  
902 populations. Missing data (2.5% of all observations) in the PCA were replaced with the mean allele  
903 frequency value. Different seed source types are depicted as different colors (yellow: *ex situ*; green:  
904 wild contemporary; brown: commercial; orange: selected).

905

906

907

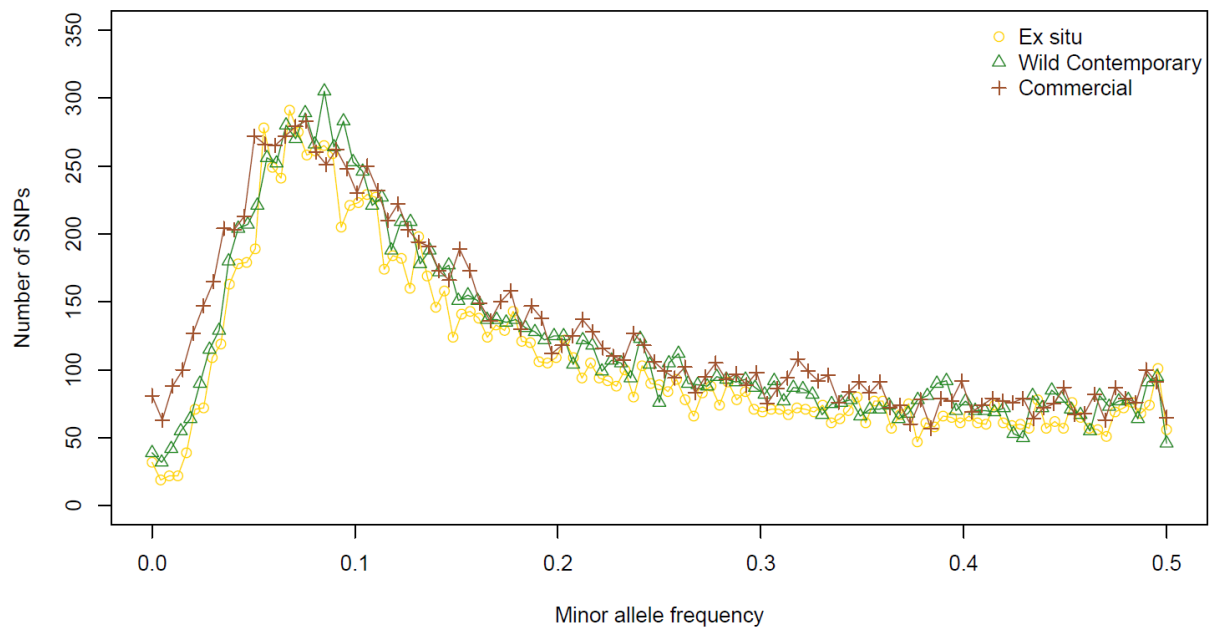

908

909 Figure 3. The site frequency spectrum for wild contemporary, *ex situ*, and commercial seed  
910 collections shows a greater number of low frequency alleles in commercial populations.

911

912

913

914

915

916

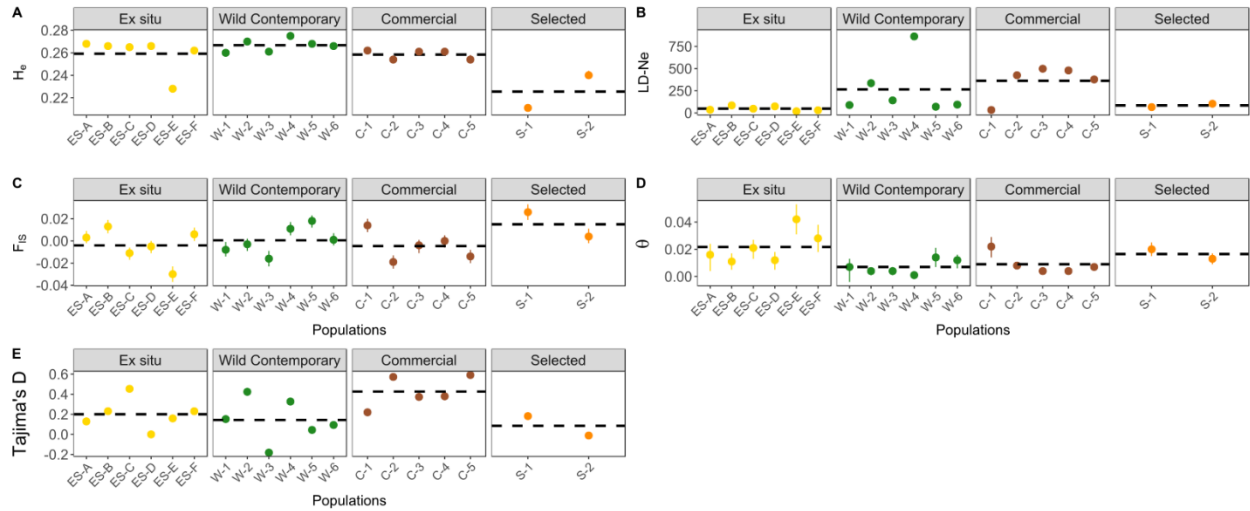

917

918 Figure 4. Estimates of (A) expected heterozygosity ( $H_e$ ), (B) linkage disequilibrium effective

919 population size ( $LD-N_e$ ), (C) inbreeding coefficients ( $F_{is}$ ), (D) coancestry coefficients ( $\theta$ ), and (E)

920 genome wide Tajima's D for commercially produced, *ex situ*, native remnant, and experimentally

921 selected *Helianthus maximiliani* seed sources. Points depict population means for panels A-D.

922 Error bars for  $LD-N_e$  and  $\theta$  are bootstrapped 95% confidence intervals estimated with 2000

923 replicates.

924

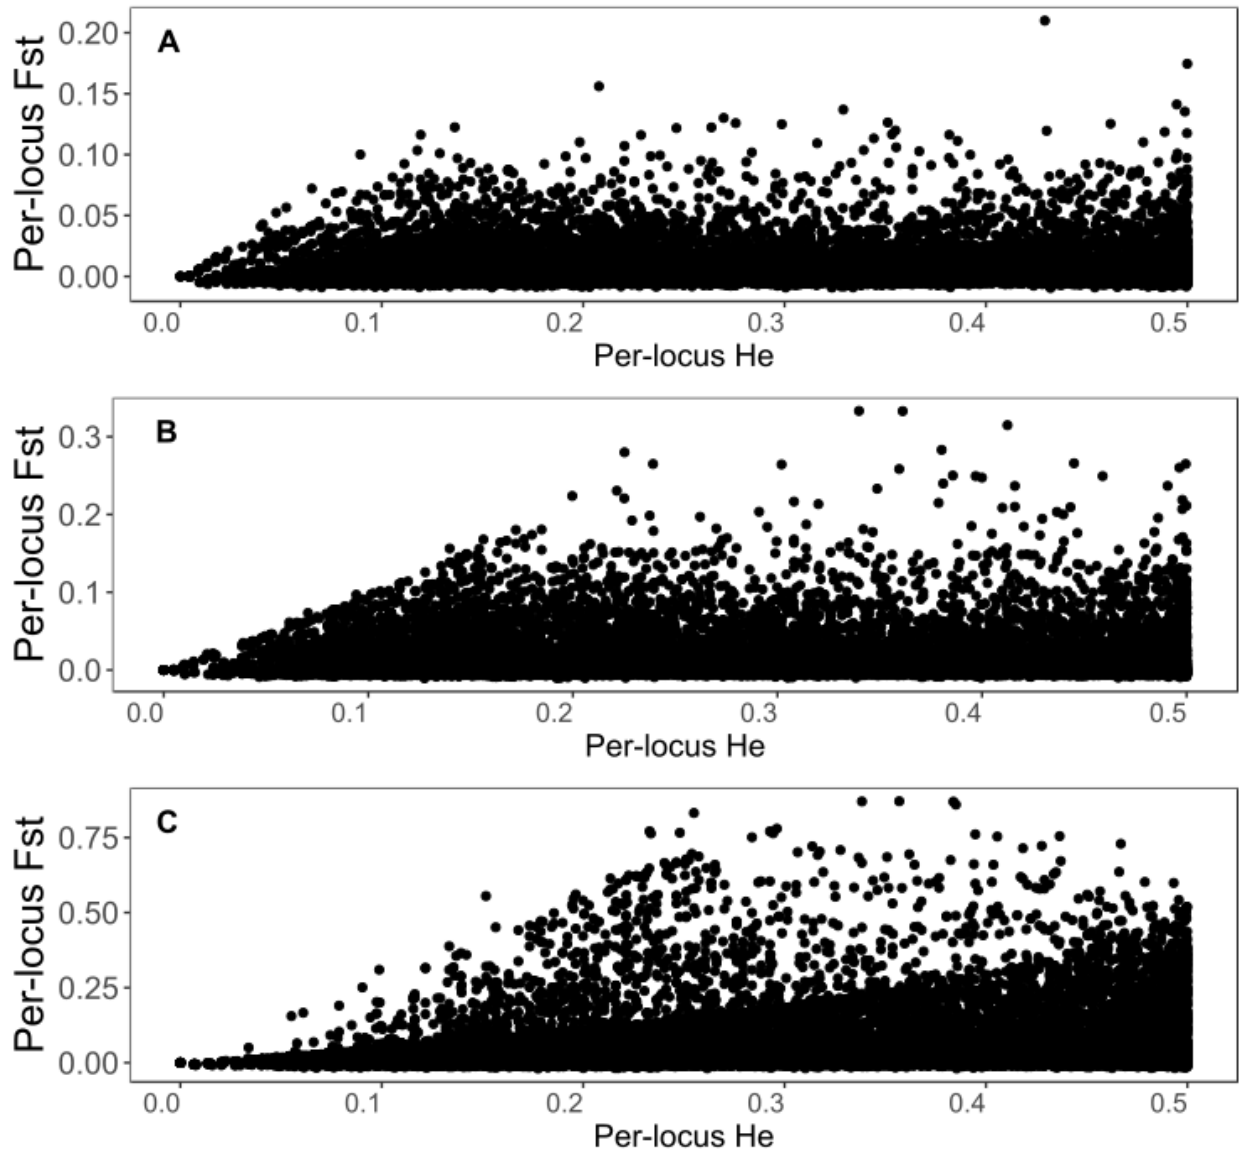

925

926 Figure 5. The per-locus relationship between  $F_{st}$  and  $H_e$  for a) wild and *ex situ* populations, b) wild  
927 and commercial populations, and c) wild and selected populations. In all comparisons, there are  
928 no loci with low  $H_e$  and moderate to high  $F_{st}$ , which matches patterns from simulation studies in  
929 which the effects of selection and neutral evolution are equivalent in magnitude.

930
